# Supplementary material
Source: publisher figshare collection journal article supplement (https://geolsoc.figshare.com/articles/dataset/_/3452984)

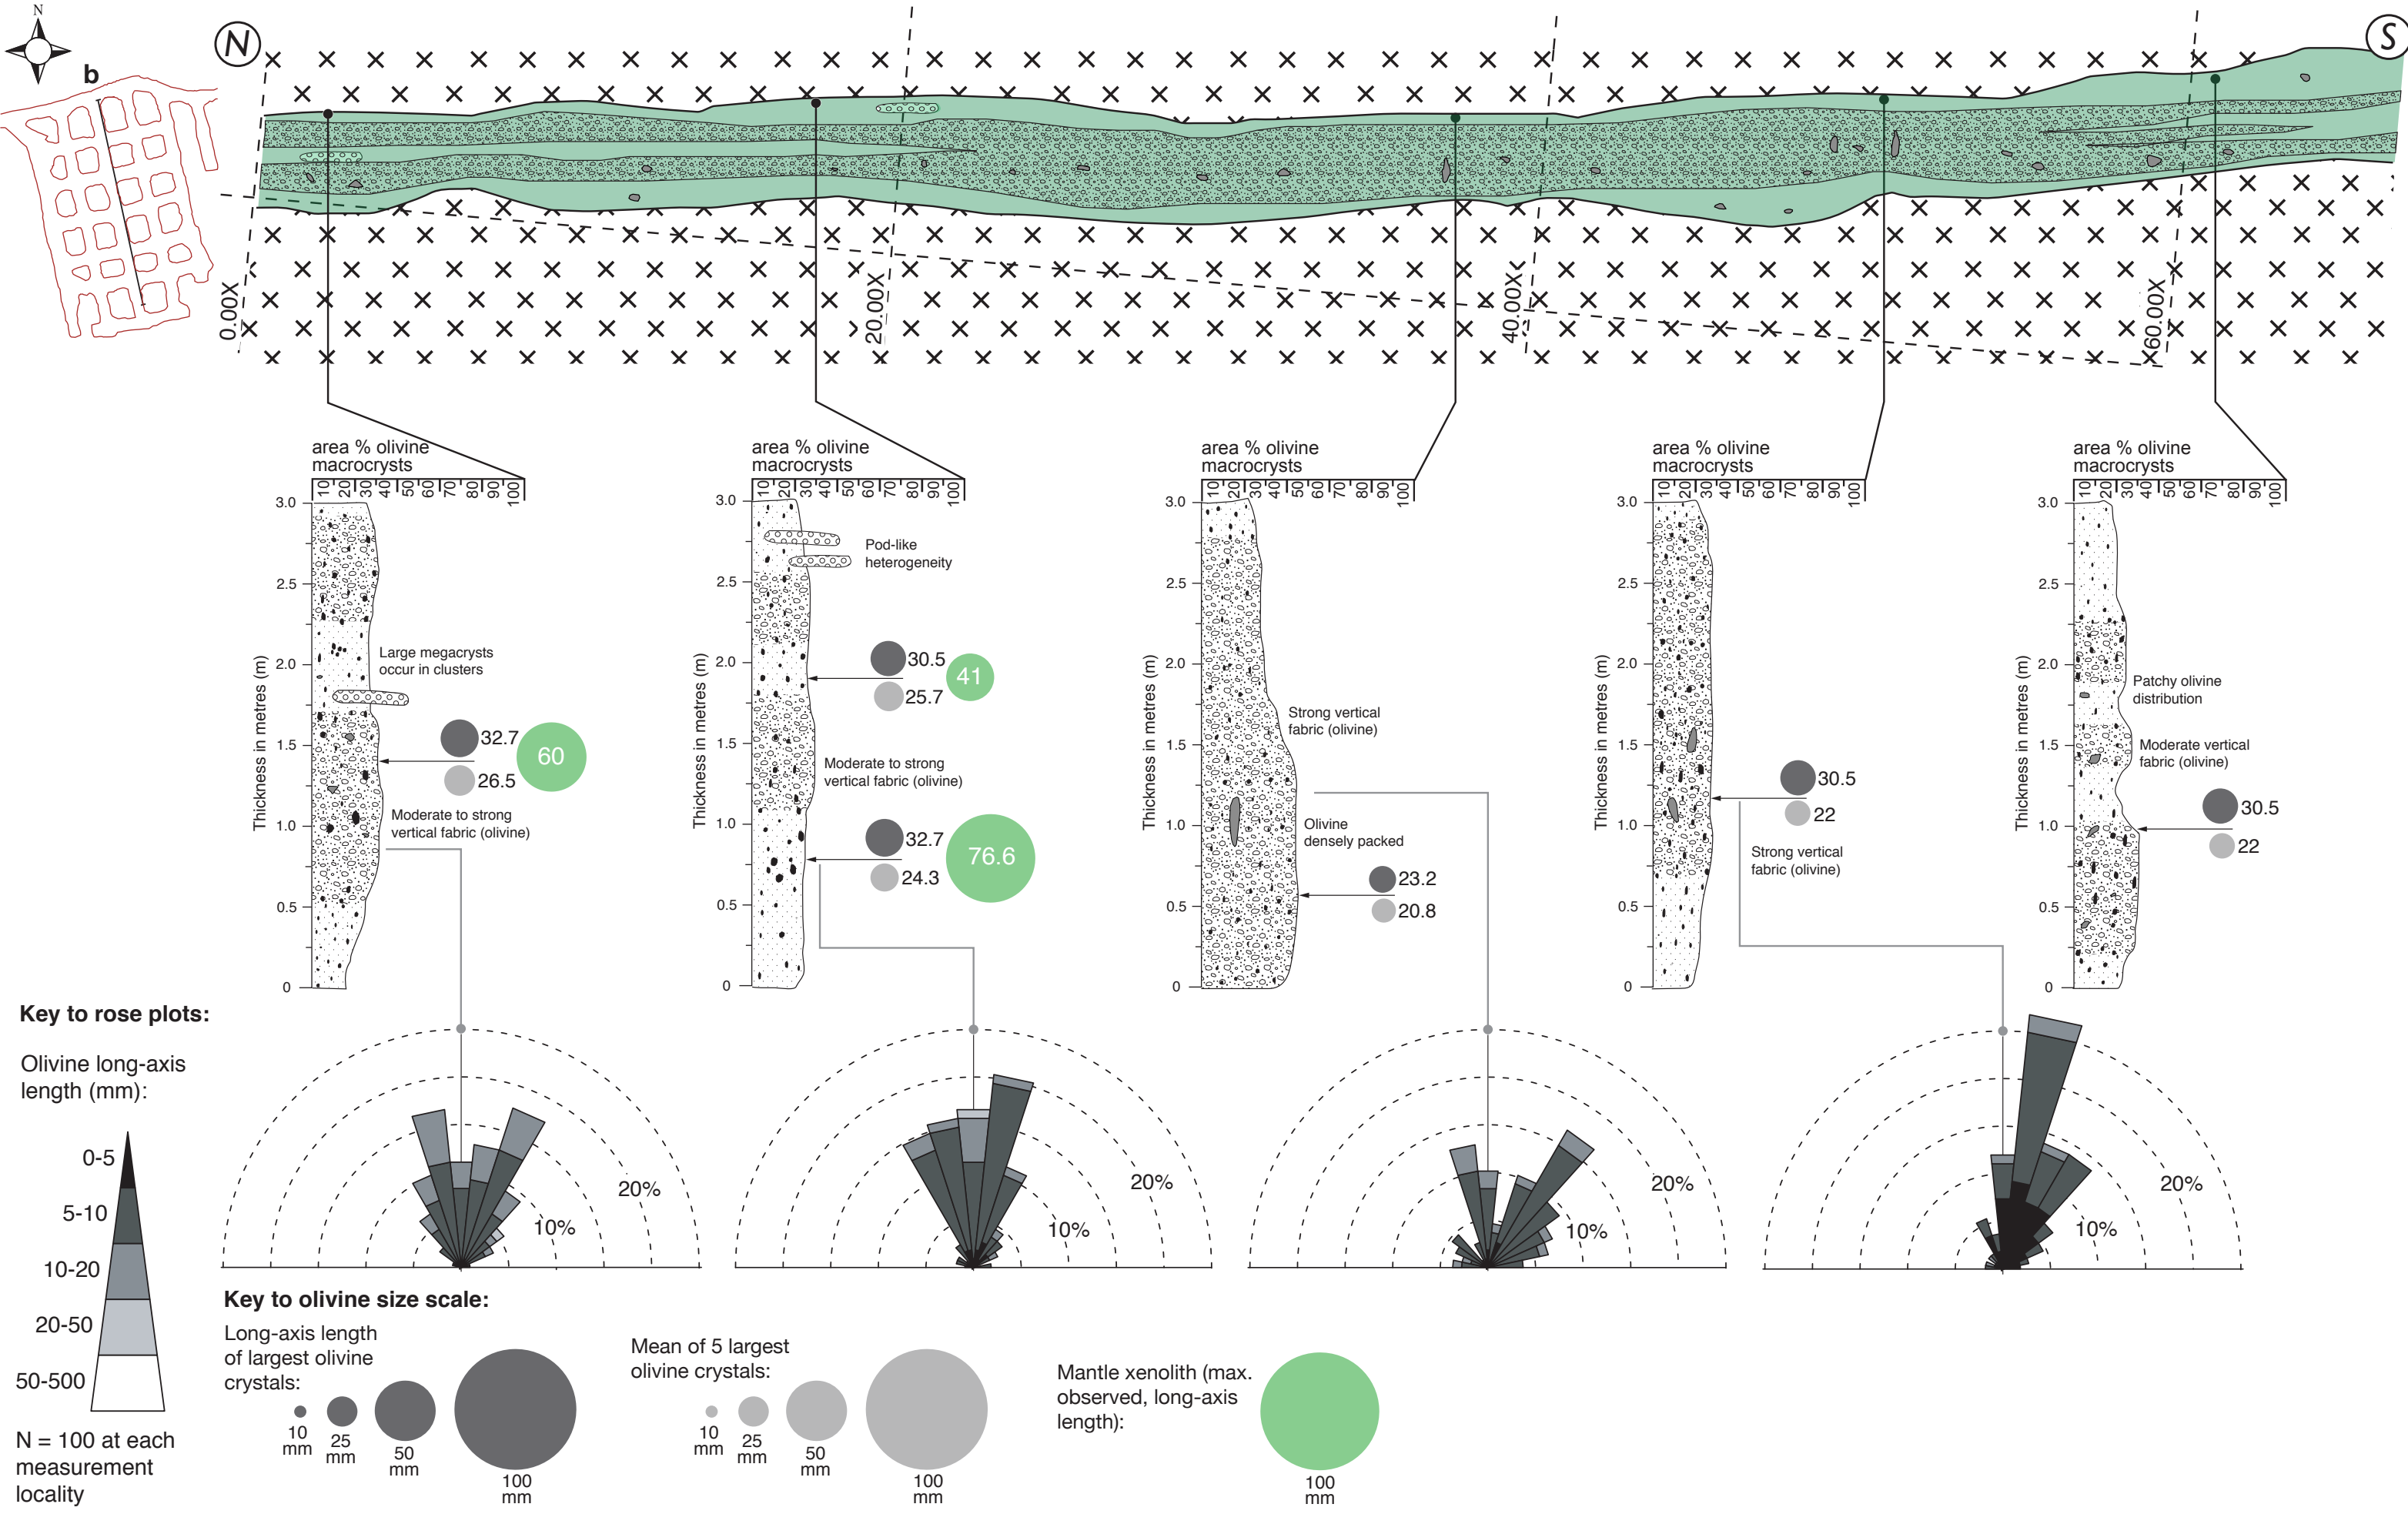

Supplementary Figure 5

Supplement: Supplementary file 1 [file 1]

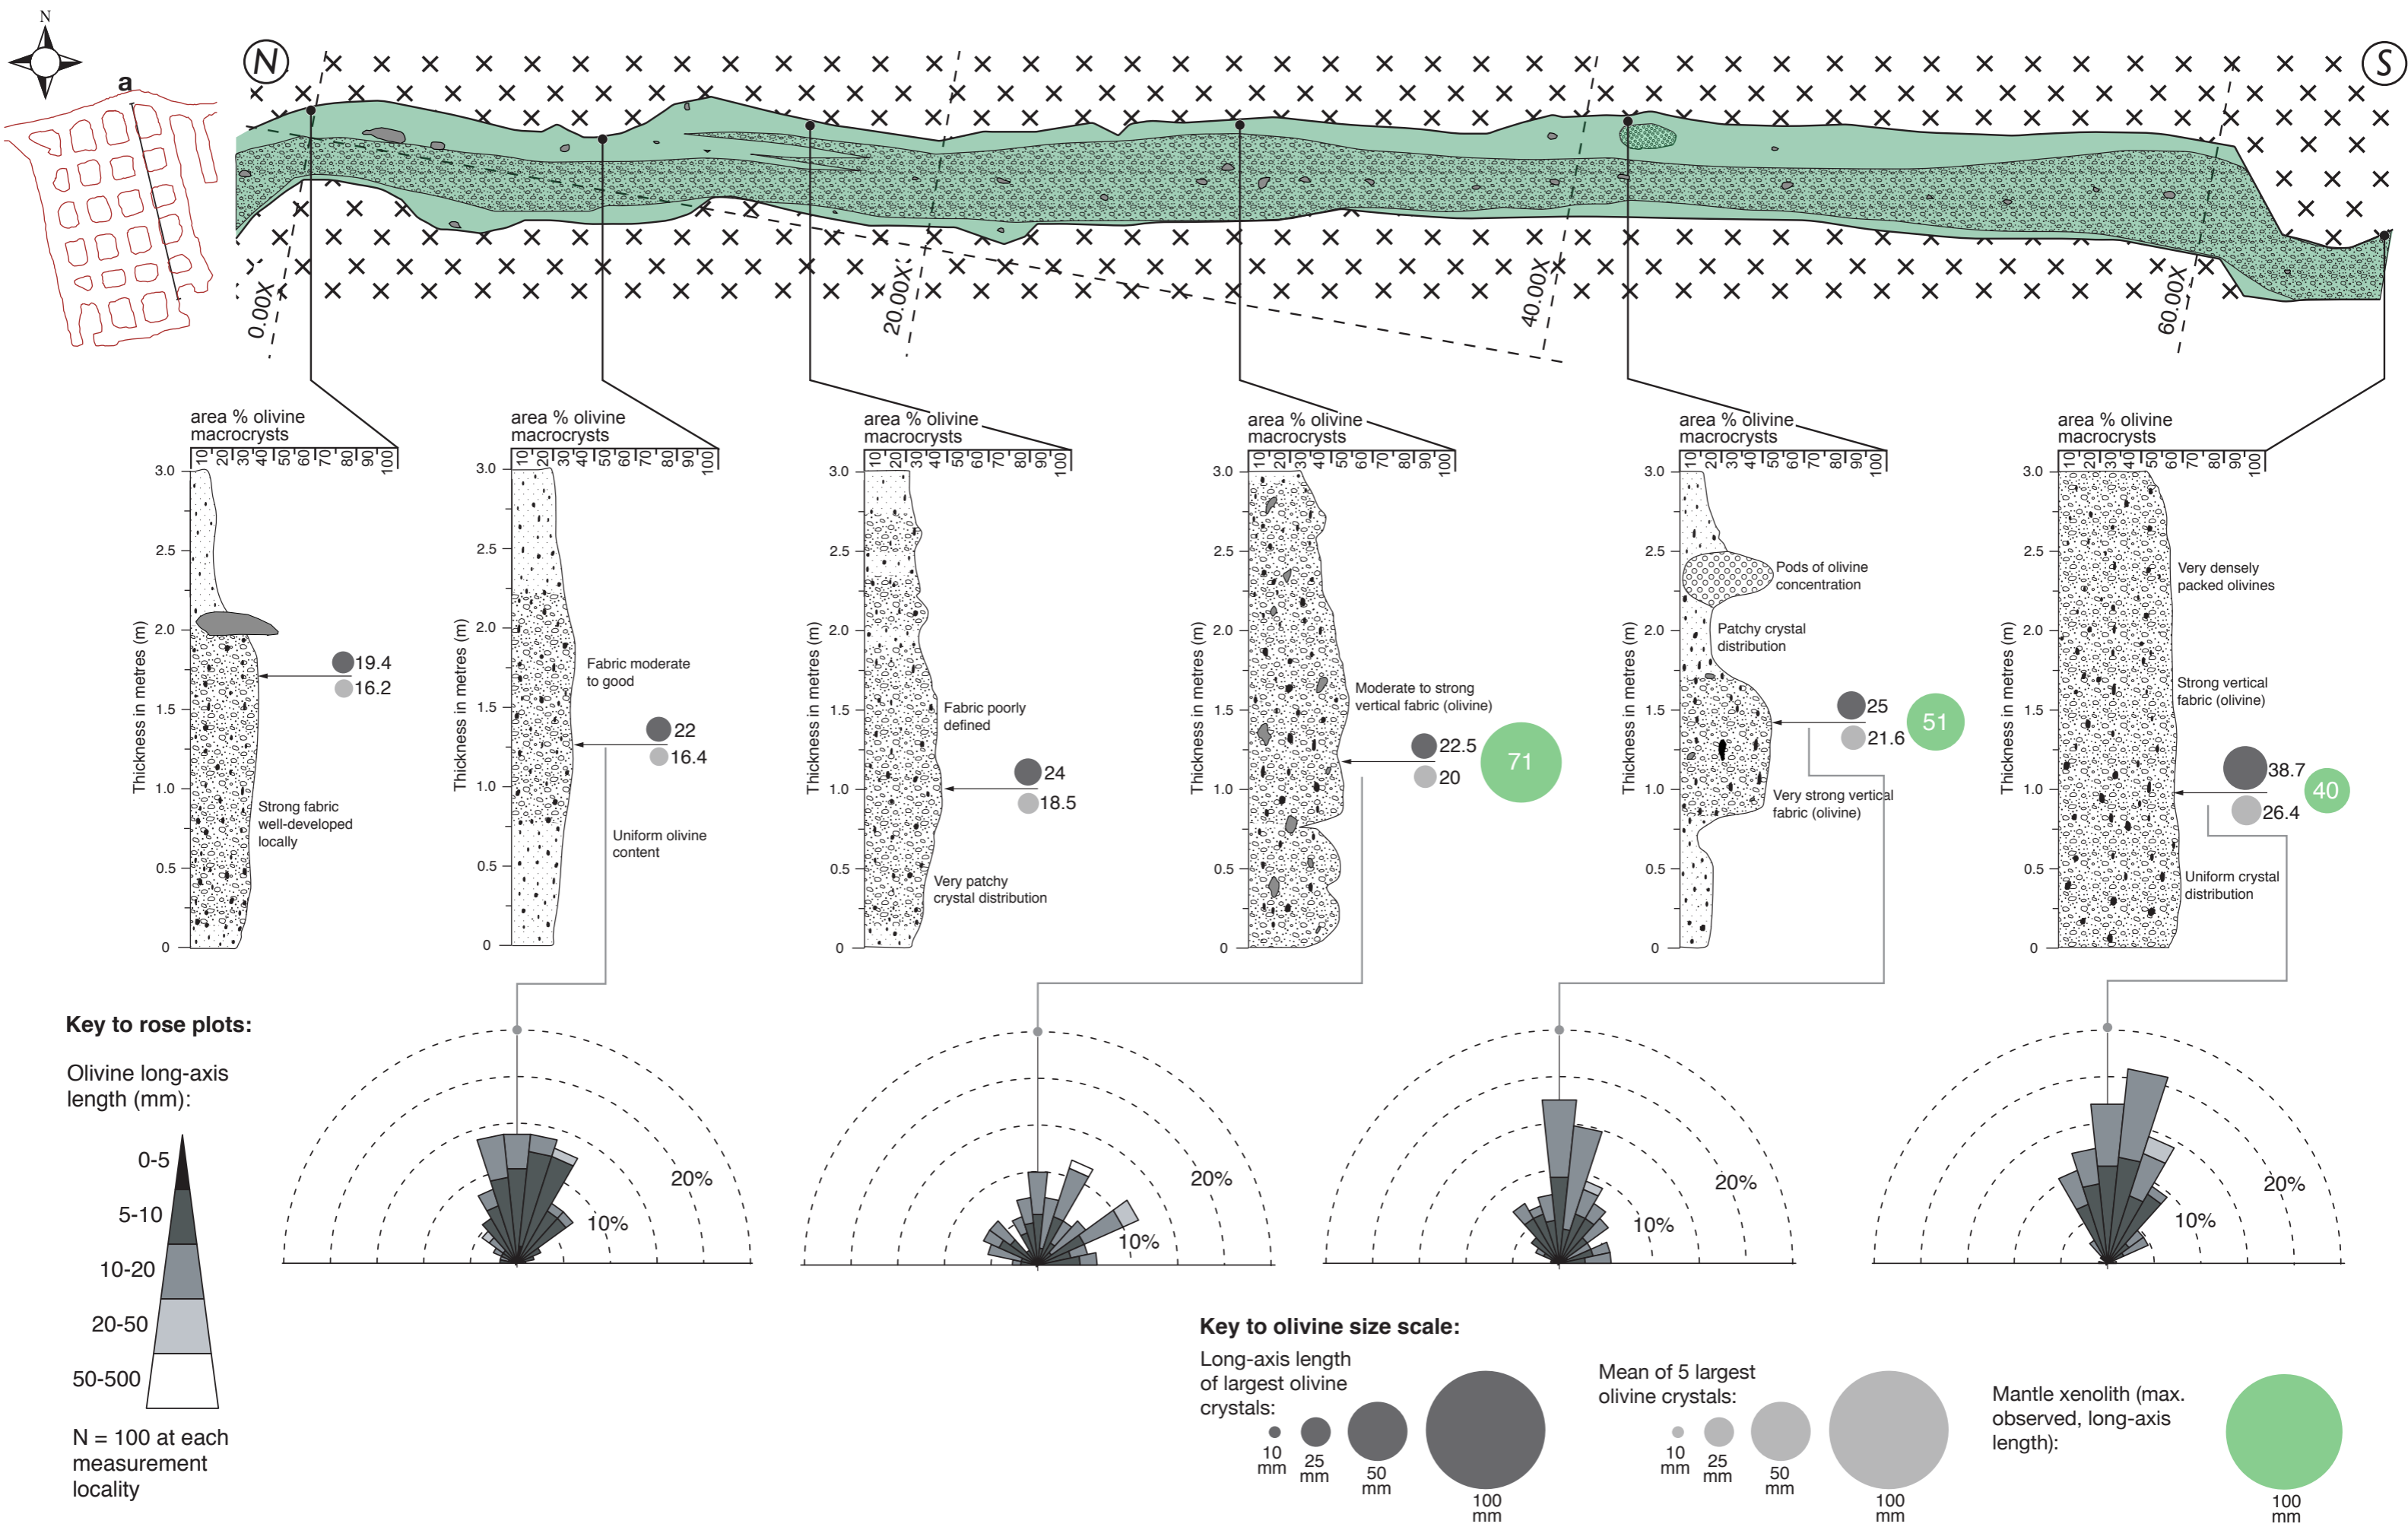

Supplementary Figure 4

Supplement: Supplementary file 2 [file 1]

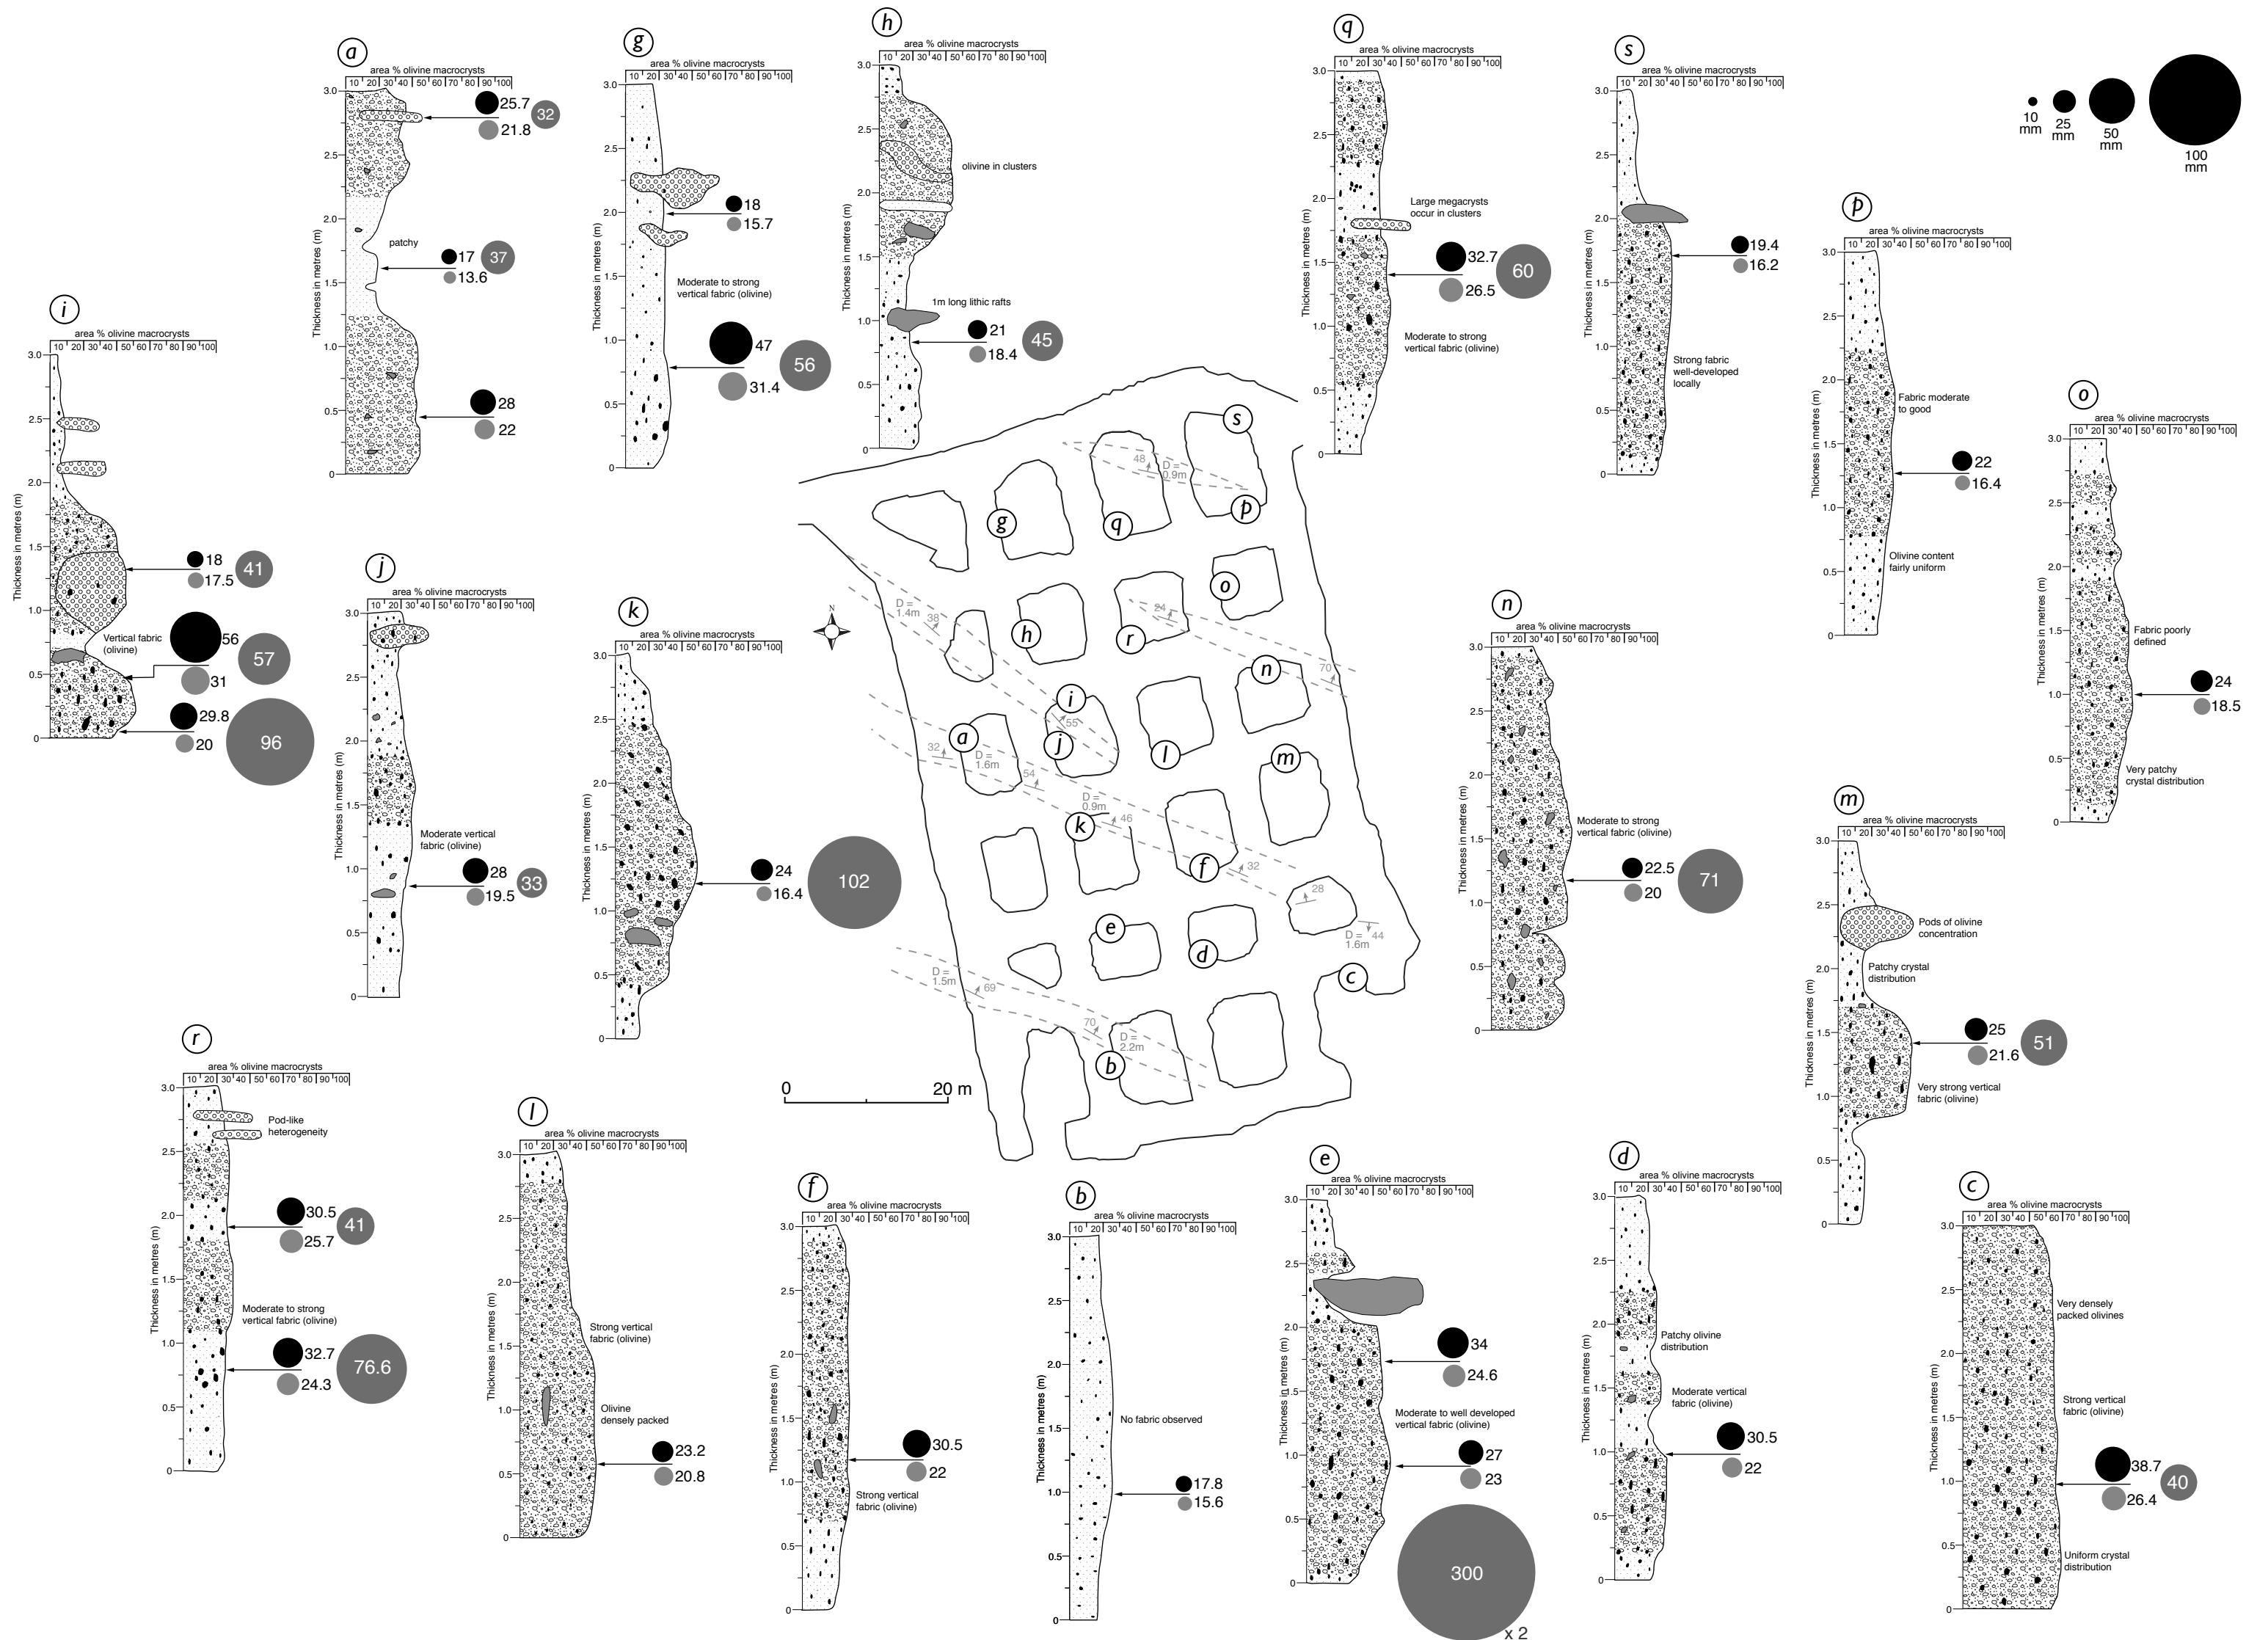

Supplementary Figure 3

Supplement: Supplementary file 3 [file 1]

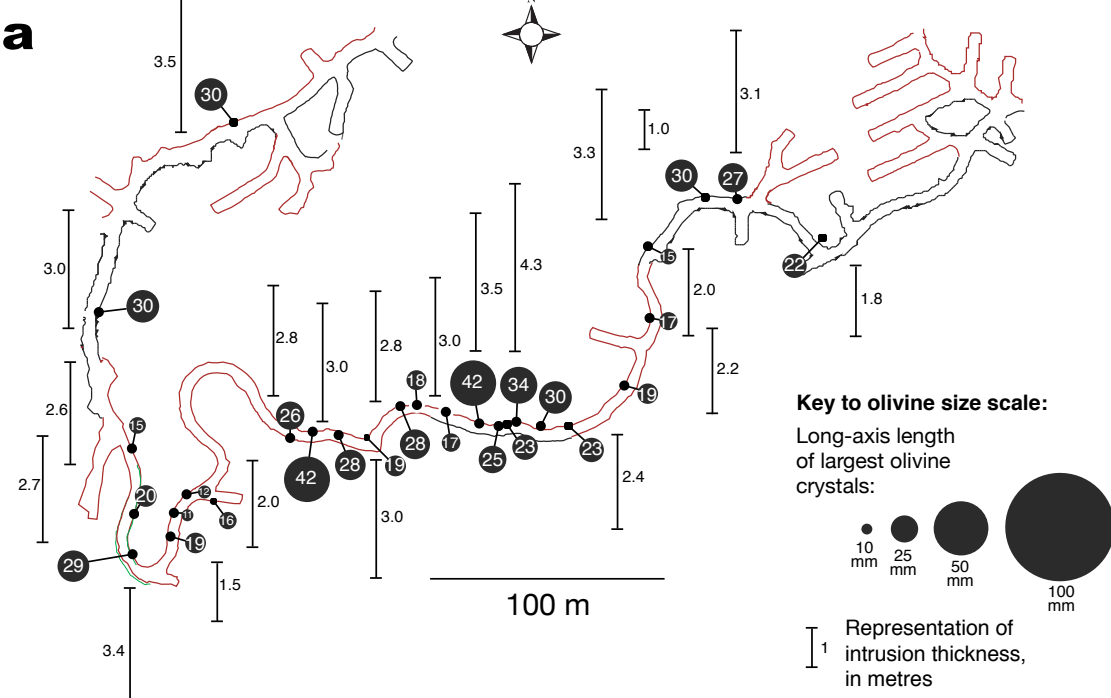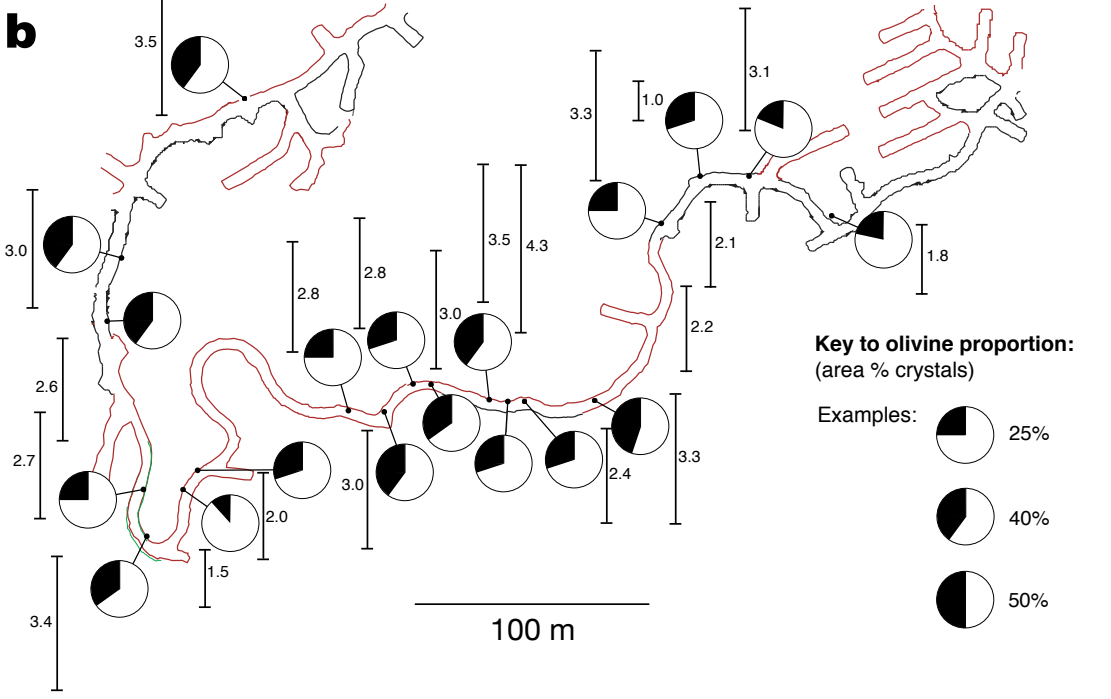

Supplementary Figure 2

Supplement: Supplementary file 6 [file 1]
